# Supplementary material for: Nanoscale chemical characterization of a post-consumer recycled polyolefin blend using tapping mode AFM-IR
Source: Royal Society of Chemistry journal article supplement (doi:10.1039/d2an00823h), 2022-01-01
Supplement: d2an00823h1.pdf [file d2an00823h1.pdf]

*Supporting information for:*

## **Nanoscale chemical characterization of a post-consumer recycled polyolefin blend using tapping mode AFM-IR**

A. Catarina V. D. dos Santos<sup>†</sup>, Davide Tranchida<sup>‡</sup>, Bernhard Lendl<sup>†,\*</sup>, Georg Ramer<sup>†,\*</sup>

<sup>†</sup> Institute of Chemical Technologies and Analytics, TU Wien, 1060 Vienna, Austria

<sup>‡</sup> Borealis Polyolefine GmbH, 4021 Linz, Austria

Corresponding authors emails: [georg.ramer@tuwien.ac.at](mailto:georg.ramer@tuwien.ac.at), [bernhard.lendl@tuwien.ac.at](mailto:bernhard.lendl@tuwien.ac.at)

### **Table of contents**

**Figure S1** AM-FM AFM images of the material analysed

**Figure S2** AFM-IR spectra of Polyamide and Polyurethane

**Figure S3** Polyamide particle sizes

**Figure S4** Dendrogram obtained for the hierarchical cluster analysis

**Figure S5** AFM-IR spectra of the interface

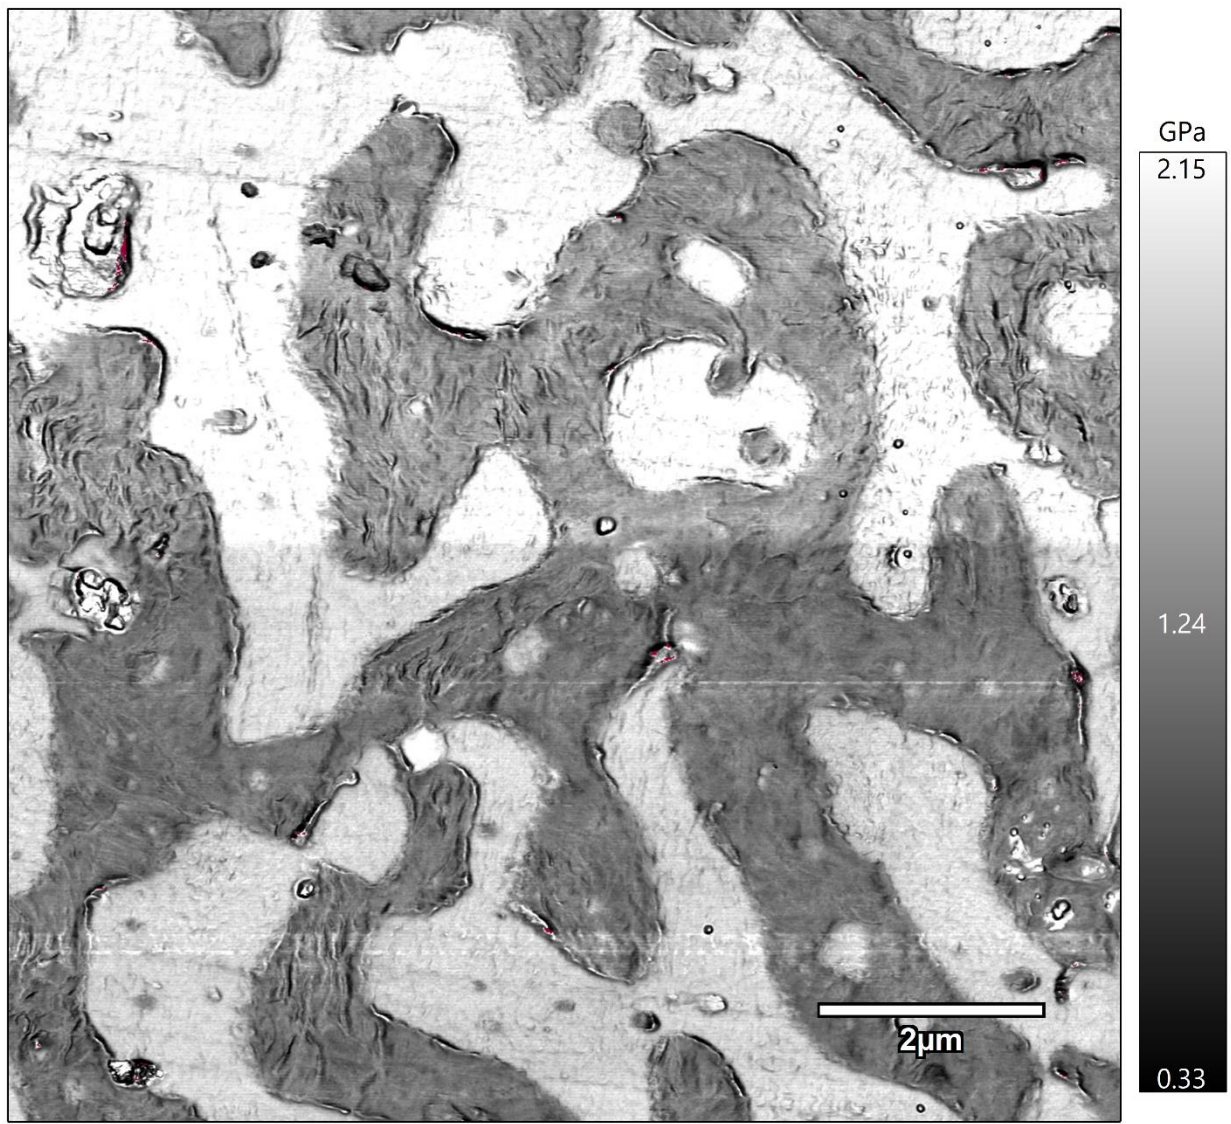

**Figure S1.** AM-FM AFM image of the material used in this study showing that the particles inside of the PE (lighter colored) phase have the same Young's modulus as the PP (darker colored) phase.

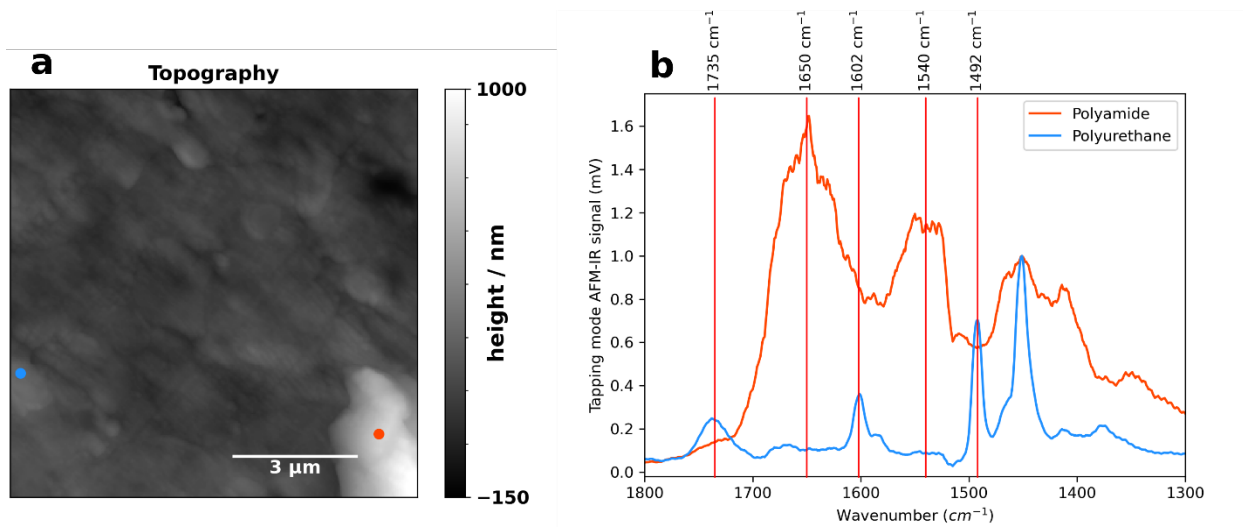

**Figure S2.** (a) Topography image of the same location as Fig. 1 and locations where AFM-IR spectra of PA (orange) and PU (blue) were obtained. (b) AFM-IR spectra obtained in the locations indicated in (a). The highlighted wavenumbers correspond to marker bands for polyamide and polyurethane.

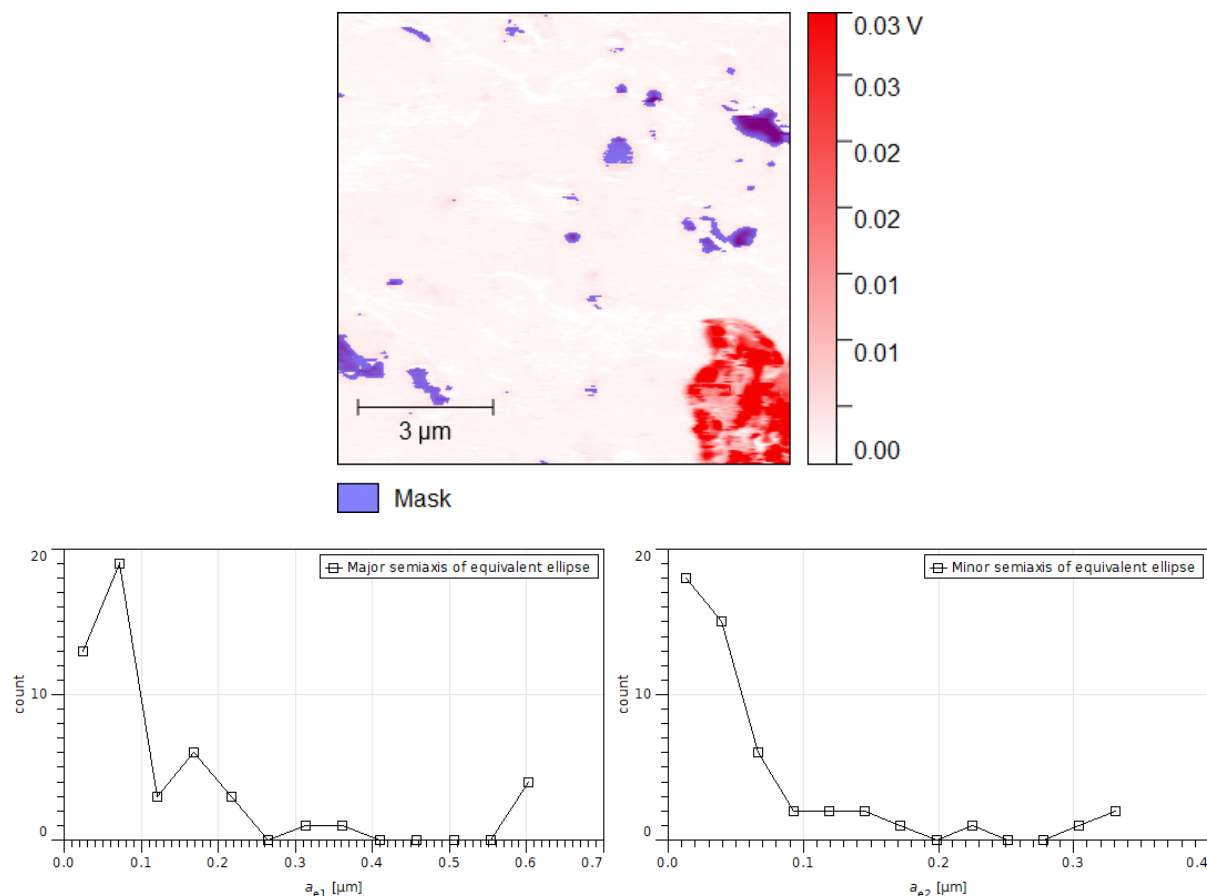

**Figure S3.** Particle size of the Polyamide particles ( $1640\text{ cm}^{-1}$  absorption map), excluding the partial particle on the bottom-left. The absorption map shows in purple the marked regions containing PA particles (mask). The size of the masked regions was then evaluated using the software Gwyddion. The two bottom graphs correspond to the size distribution of the PA particles according to their major and minor axes.

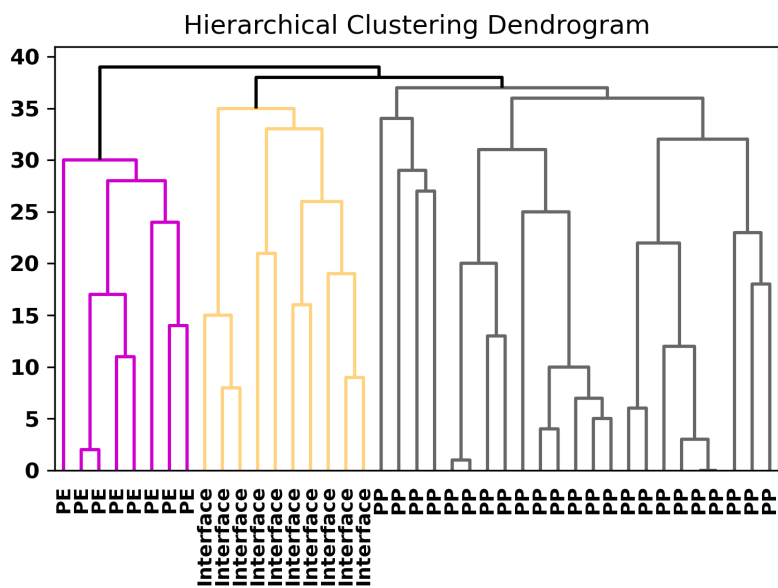

**Figure S4.** Dendrogram obtained for the hierarchical cluster analysis.

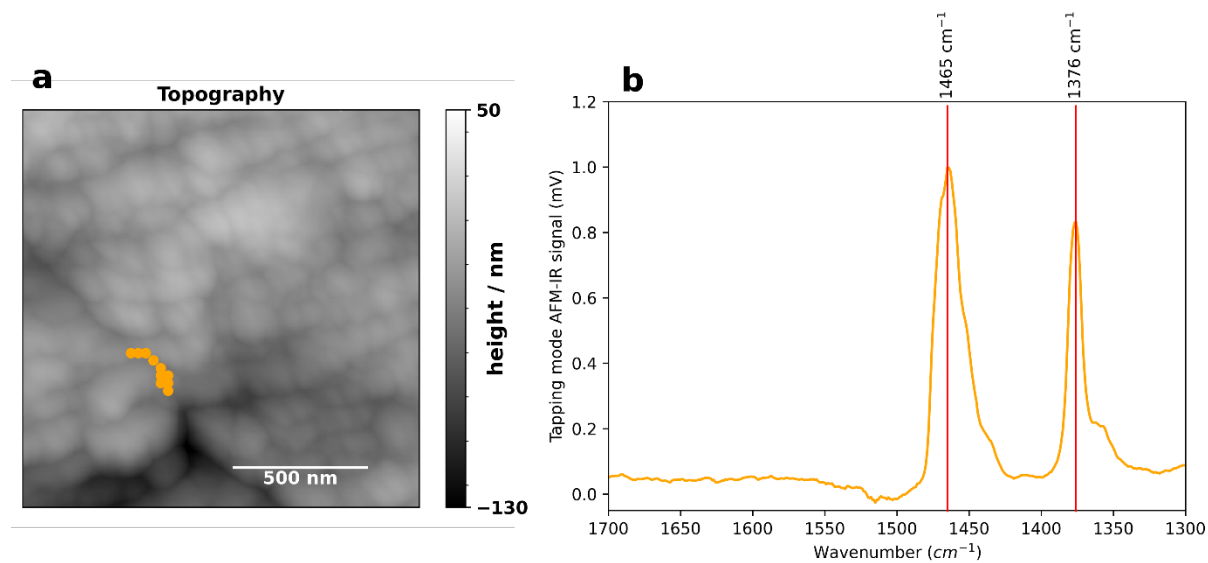

**Figure S5.** (a) topography image of the same location as Fig. 2 and locations of AFM-IR spectra classified by the HCA as interface. (b) average AFM-IR spectra of the interface showing no bands corresponding to the presence of aromatic groups.
